# Supplementary material for: Lead and cadmium toxicity effects on the Pinus roxburghii seed germination and early seedling growth in different environments
Source: PeerJ. 2025 Aug 6;13:e19593. doi: 10.7717/peerj.19593 (PMC12335238; doi:10.7717/peerj.19593)
Supplement: Supplemental Information 2 [file peerj-13-19593-s002.xls]

## Sheet: Sheet1
	Cd Hetrogenous data		Physiological and biochemical raw data for table 2									Pb Hetrogenousdata		Physiological and biochemical raw data for table 2
	treatment	Replicate	Proline	Sugar	Chl a	Chl b	Total chl	Carotenoid				treatment	Replicate	Proline	Sugar	Chl a	Chl b	Total chl	Carotenoid
	C	1	0.3	0.5	2	2.6	4.6	1.09				C	1	0.3	0.5	2	2.6	4.6	1.09
	C	2	0.32	0.5	2.6	2.65	5.25	2.5				C	2	0.32	0.5	2.6	2.65	5.25	2.5
	C	3	0.43	0.39	3.59	2.76	6.35	2.2				C	3	0.43	0.39	3.59	2.76	6.35	2.2
	T1	1	0.48	0.6	1	1.7	2.7	1				T1	1	0.4	0.55	2.61	1.8	3.85	1
	T1	2	0.42	0.63	4.08	1.72	5.8	2.26				T1	2	0.5	0.6	2.55	1.9	4.6	2.28
	T1	3	0.66	0.83	2	1.59	3.59	1.62				T1	3	0.45	0.74	2.67	1.79	4.87	1.64
	T2	1	0.5	0.85	2	1.4	3.4	0.8				T2	1	0.4	0.59	2	1.6	3.6	1
	T2	2	0.56	0.7	2	1.3	3.3	1.1				T2	2	0.5	0.62	2.33	1.65	3.98	1.6
	T2	3	0.52	0.65	2.39	1.72	4.11	1				T2	3	0.54	0.83	2.66	1.76	4.42	1.1
	T3	1	0.5	0.75	1	1	2	0.71				T3	1	0.45	0.5	1.03	1.49	2.52	0.81
	T3	2	0.58	0.6	2.08	2.3	4.38	0.9				T3	2	0.48	0.69	2	1.4	3.4	0.8
	T3	3	0.54	0.6	1.54	0.8	2.34	1				T3	3	0.54	0.6	3.06	1.39	4.45	1
	T4	1	0.55	0.48	1.4	0.8	2.2	1				T4	1	0.58	0.4	1	0.7	1.7	0.6
	T4	2	0.6	0.53	1.3	1.1	2.4	0.6				T4	2	0.5	0.6	2.3	0.91	3.21	0.7
	T4	3	0.53	0.7	1.55	1	2.53	0.69				T4	3	0.45	0.7	0.7	1	1.7	0.74
	T5	1	0.57	0.49	1	0.5	1.5	1				T5	1	0.57	0.46	1	0.48	1.48	0.45
	T5	2	0.51	0.55	2	0.57	2.57	0.6				T5	2	0.52	0.61	1.5	0.53	2.03	0.61
	T5	3	0.63	0.52	1	0.52	1.52	0.55				T5	3	0.5	0.5	1	0.7	1.7	0.52
	T6	1	0.53	0.47	0.8	0.2	1	0.4				T6	1	0.55	0.5	0.7	0.3	1	0.37
	T6	2	0.58	0.5	1.08	0.25	1.33	0.6				T6	2	0.53	0.52	0.78	0.38	1.16	0.29
	T6	3	0.63	0.47	0.94	0.4	1.34	0.8				T6	3	0.51	0.46	1	0.34	1.34	0.32
	Cd homogenous data		Physiological and Biochemical raw data for table 4									Pb homogenous data		Physiological and Biochemical raw data for table 4
	treatment	Replicate	Proline	Sugar	Chl a	Chl b	Tot chl	Carotenoid				treatment	Replicate	Proline	Sugar	Chl a	Chl b	Tot chl	Carotenoid
	C	1	0.22	0.3	2.6	1.6	4.2	2.4				C	1	0.22	0.3	2.6	1.6	4.41	2.4
	C	2	0.18	0.32	2.7	1.81	4.51	2.57				C	2	0.18	0.32	2.7	1.81	4.35	2.57
	C	3	0.29	0.43	2.51	2.04	4.63	2.63				C	3	0.29	0.43	2.51	2.04	4.48	2.63
	T1	1	0.29	0.4	2.3	1.3	3.6	1.7				T1	1	0.38	0.45	2.2	1.4	3.6	1.62
	T1	2	0.36	0.5	2.38	1.46	3.84	1.8				T1	2	0.28	0.47	2.3	1.3	3.6	1.75
	T1	3	0.36	0.45	2.34	1.62	3.96	1.68				T1	3	0.32	0.49	2.25	1.54	3.79	1.64
	T2	1	0.31	0.43	2	1.36	3.36	1.02				T2	1	0.3	0.5	1.6	1	2.6	1.21
	T2	2	0.42	0.47	2.12	1.25	3.37	1.15				T2	2	0.35	0.42	1.7	1.09	2.79	1.43
	T2	3	0.35	0.54	1.98	1.44	3.42	1.37				T2	3	0.4	0.61	1.59	0.99	2.58	1.35
	T3	1	0.25	0.43	1.68	0.7	2.38	0.9				T3	1	0.31	0.46	1.24	0.601	1.901	0.9
	T3	2	0.28	0.38	1.7	0.65	2.35	1.02				T3	2	0.35	0.4	1.27	1.06	2.28	1
	T3	3	0.37	0.48	1.59	0.87	2.46	0.9				T3	3	0.42	0.52	1.39	0.83	2.23	1
	T4	1	0.24	0.36	1.2	0.6	1.8	0.7				T4	1	0.28	0.4	0.8	0.48	1.44	1
	T4	2	0.27	0.46	1.5	0.7	2.2	0.76				T4	2	0.36	0.38	0.84	0.6	1.38	0.6
	T4	3	0.33	0.41	1	0.59	1.59	0.82				T4	3	0.44	0.51	0.91	0.69	1.5	0.59
	T5	1	0.22	0.36	0.7	0.48	1.18	0.55				T5	1	0.33	0.35	0.6	0.4	1	0.5
	T5	2	0.26	0.4	0.8	0.56	1.36	0.6				T5	2	0.35	0.43	0.67	0.38	1.05	0.6
	T5	3	0.39	0.38	1	0.52	1.52	0.6				T5	3	0.34	0.39	0.74	0.51	1.25	0.6
	T6	1	0.24	0.3	0.48	0.3	0.78	0.4				T6	1	0.32	0.3	0.4	0.32	0.72	0.3
	T6	2	0.25	0.35	0.56	0.38	0.94	0.37				T6	2	0.39	0.44	0.46	0.4	0.86	0.44
	T6	3	0.4	0.43	0.52	0.34	0.86	0.51				T6	3	0.27	0.37	0.52	0.36	0.88	0.37
